# Supplementary material for: Deviation of Chinese Adults’ Diet from the Chinese Food Pagoda 2016 and Its Association with Adiposity
Source: MDPI journal article supplement (doi:10.3390/nu9090995), 2017-09-08
Supplement: s1 [file s1]

# Supplementary Materials: Deviation of Chinese Adults' Diet from the Chinese Food Pagoda 2016 and Its Association with Adiposity

Xu Tian, Yingying Huang and Hui Wang

**Table S1 Daily food consumption (g/d) in China**

| Food group              | Real Consumption            |                            |                            |                            |                            | Trend Test ( <i>p</i> ) | Dietary Guidelines |                  |        |       |
|-------------------------|-----------------------------|----------------------------|----------------------------|----------------------------|----------------------------|-------------------------|--------------------|------------------|--------|-------|
|                         | Total                       | 2004<br>( <i>n</i> = 3427) | 2006<br>( <i>n</i> = 3369) | 2009<br>( <i>n</i> = 3454) | 2011<br>( <i>n</i> = 4202) |                         | Recommended        | Under            | Within | Above |
| Cereal potato and beans | 432.7 ± 198.1 <sup>a*</sup> | 463.8 ± 209.5              | 440.7 ± 190.0              | 428.7 ± 183.2              | 404.2 ± 202.4              | 0.008                   | 250–400            | 13% <sup>b</sup> | 39%    | 48%   |
| Fruits                  | 53.3 ± 117.7 <sup>#</sup>   | 22.1 ± 79.8                | 50.9 ± 147.8               | 53.5 ± 104.4               | 80.6 ± 124.6               | 0.038                   | 200–350            | 90%              | 7%     | 3%    |
| Vegetables              | 307.9 ± 172.1               | 324.3 ± 193.4              | 319.1 ± 175.3              | 311.2 ± 162.6              | 282.9 ± 155.0              | 0.076                   | 300–500            | 54%              | 35%    | 11%   |
| Eggs                    | 27.8 ± 36.0 <sup>#</sup>    | 23.8 ± 37.0                | 27.0 ± 37.1                | 29.8 ± 36.3                | 30.0 ± 33.7                | 0.050                   | 40–50              | 70%              | 11%    | 19%   |
| Aquatic products        | 31.6 ± 55.9 <sup>#</sup>    | 28.4 ± 55.1                | 30.2 ± 56.4                | 34.5 ± 58.1                | 33.0 ± 54.0                | 0.148                   | 40–75              | 71%              | 13%    | 16%   |
| Meat and poultry        | 88.8 ± 84.3 <sup>*</sup>    | 81.8 ± 85.6                | 87.7 ± 87.0                | 90.7 ± 81.2                | 93.7 ± 83.2                | 0.016                   | 40–75              | 33%              | 20%    | 47%   |
| Legumes and nuts        | 51.9 ± 71.0 <sup>*</sup>    | 45.7 ± 67.1                | 49.3 ± 68.4                | 57.9 ± 76.7                | 54.2 ± 70.9                | 0.180                   | 25–35              | 46%              | 10%    | 44%   |
| Milk and its products   | 13.4 ± 52.8 <sup>#</sup>    | 12.2 ± 57.8                | 10.2 ± 42.6                | 9.0 ± 39.8                 | 21.7 ± 63.2                | 0.389                   | >300               | 100%             | -      | 0%    |
| Oil                     | 45.8 ± 102.6 <sup>*</sup>   | 44.8 ± 45.1                | 41.3 ± 34.2                | 49.3 ± 106.4               | 47.3 ± 155.8               | 0.420                   | 25-30              | 33%              | 9%     | 57%   |
| Salt                    | 9.9 ± 17.8 <sup>*</sup>     | 11.0 ± 12.5                | 9.5 ± 9.3                  | 9.8 ± 22.1                 | 9.5 ± 22.2                 | 0.241                   | <6                 | 35%              | -      | 65%   |

Notes: <sup>a</sup> Values are presented in mean ± standard deviation; <sup>\*</sup> Significantly greater than the upper bound of dietary guideline at *p* < 0.05; <sup>#</sup> Significantly smaller than the lower bound of dietary guideline at *p* < 0.05; <sup>b</sup> Percentage of observations whose real consumption fall under, within or above the recommend level of dietary guideline.
